# Supplementary material
Source: Springer Nature journal article supplement (https://www.springermedizin.de/resource/supplementary/12865_2014_581_MOESM3_ESM.pdf/9428282)
Supplement: MOESM3 [file 9428282]

### Blood leucocytes

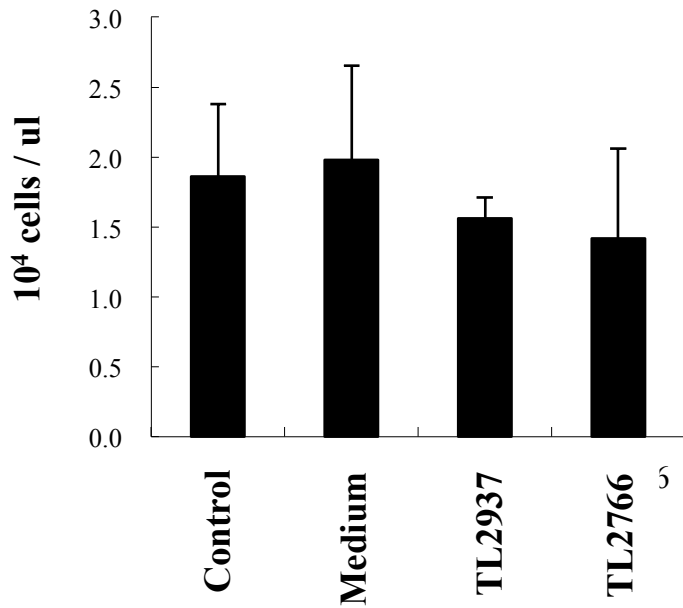

### Granulocytes/lymphocytes ratio

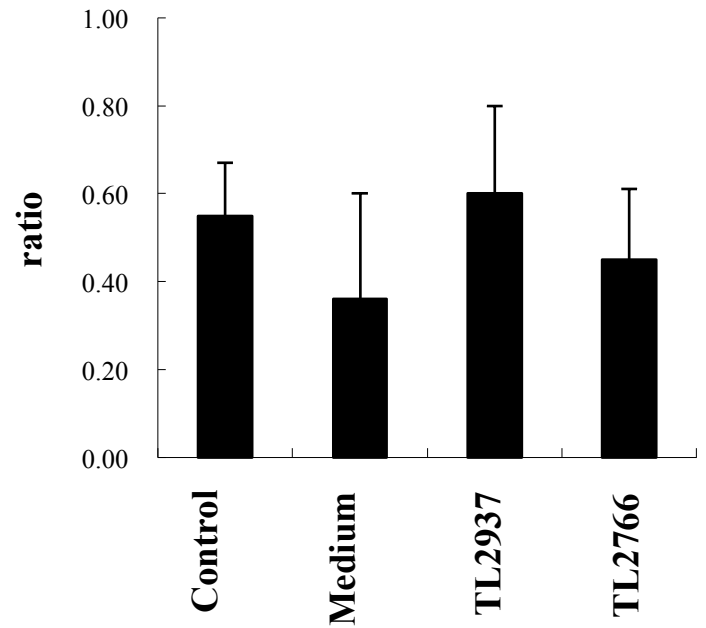

### Phagocytes activity

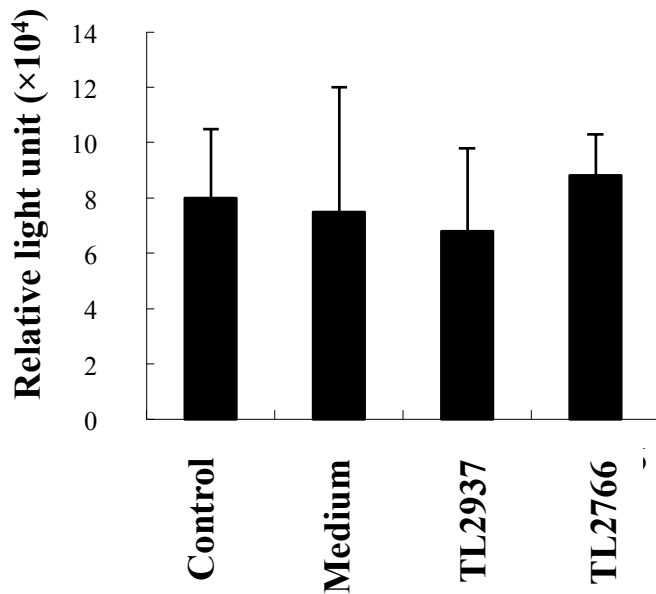

### Blood antibodies

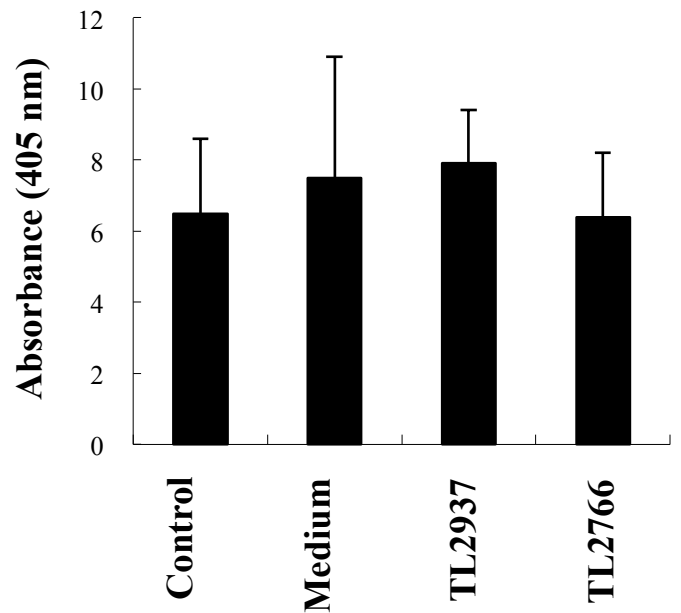

**Supplemental Figure 2.** Effect of *Lactobacillus jensenii* TL2937 on piglets' blood immune system markers. Pigs were grown from 3 weeks of age until week 24. Five pigs were used for each experimental group. The Control group was fed only the balanced conventional diet without antimicrobials *ad libitum*. The Medium, TL2937 and TL2766 groups were fed balanced conventional diet with supplemental bacteria medium only (200 g/day), *L. jensenii* TL2937 (3×10<sup>8</sup> cfu/g) or *L. plantanum* TL2766 (3×10<sup>8</sup> cfu/g) respectively, from 3 to 17 weeks of age. Levels of blood leucocytes, granulocytes/lymphocytes ratio, phagocytes activity, and antibodies were determined at the end of experiments. Values for bars with different letters were significantly different (P<0.05). Values for bars with shared letters do not differ significantly.
